# Supplementary material for: Ketogenic diet attenuates neuroinflammation and induces conversion of M1 microglia to M2 in an EAE model of multiple sclerosis by regulating the NF-κB/NLRP3 pathway and inhibiting HDAC3 and P2X7R activation
Source: Royal Society of Chemistry journal article supplement (doi:10.1039/d3fo00122a), 2023-01-01

In the following figures, C represents the control group, E represents the EAE group, and K represents the EAE+KD group.

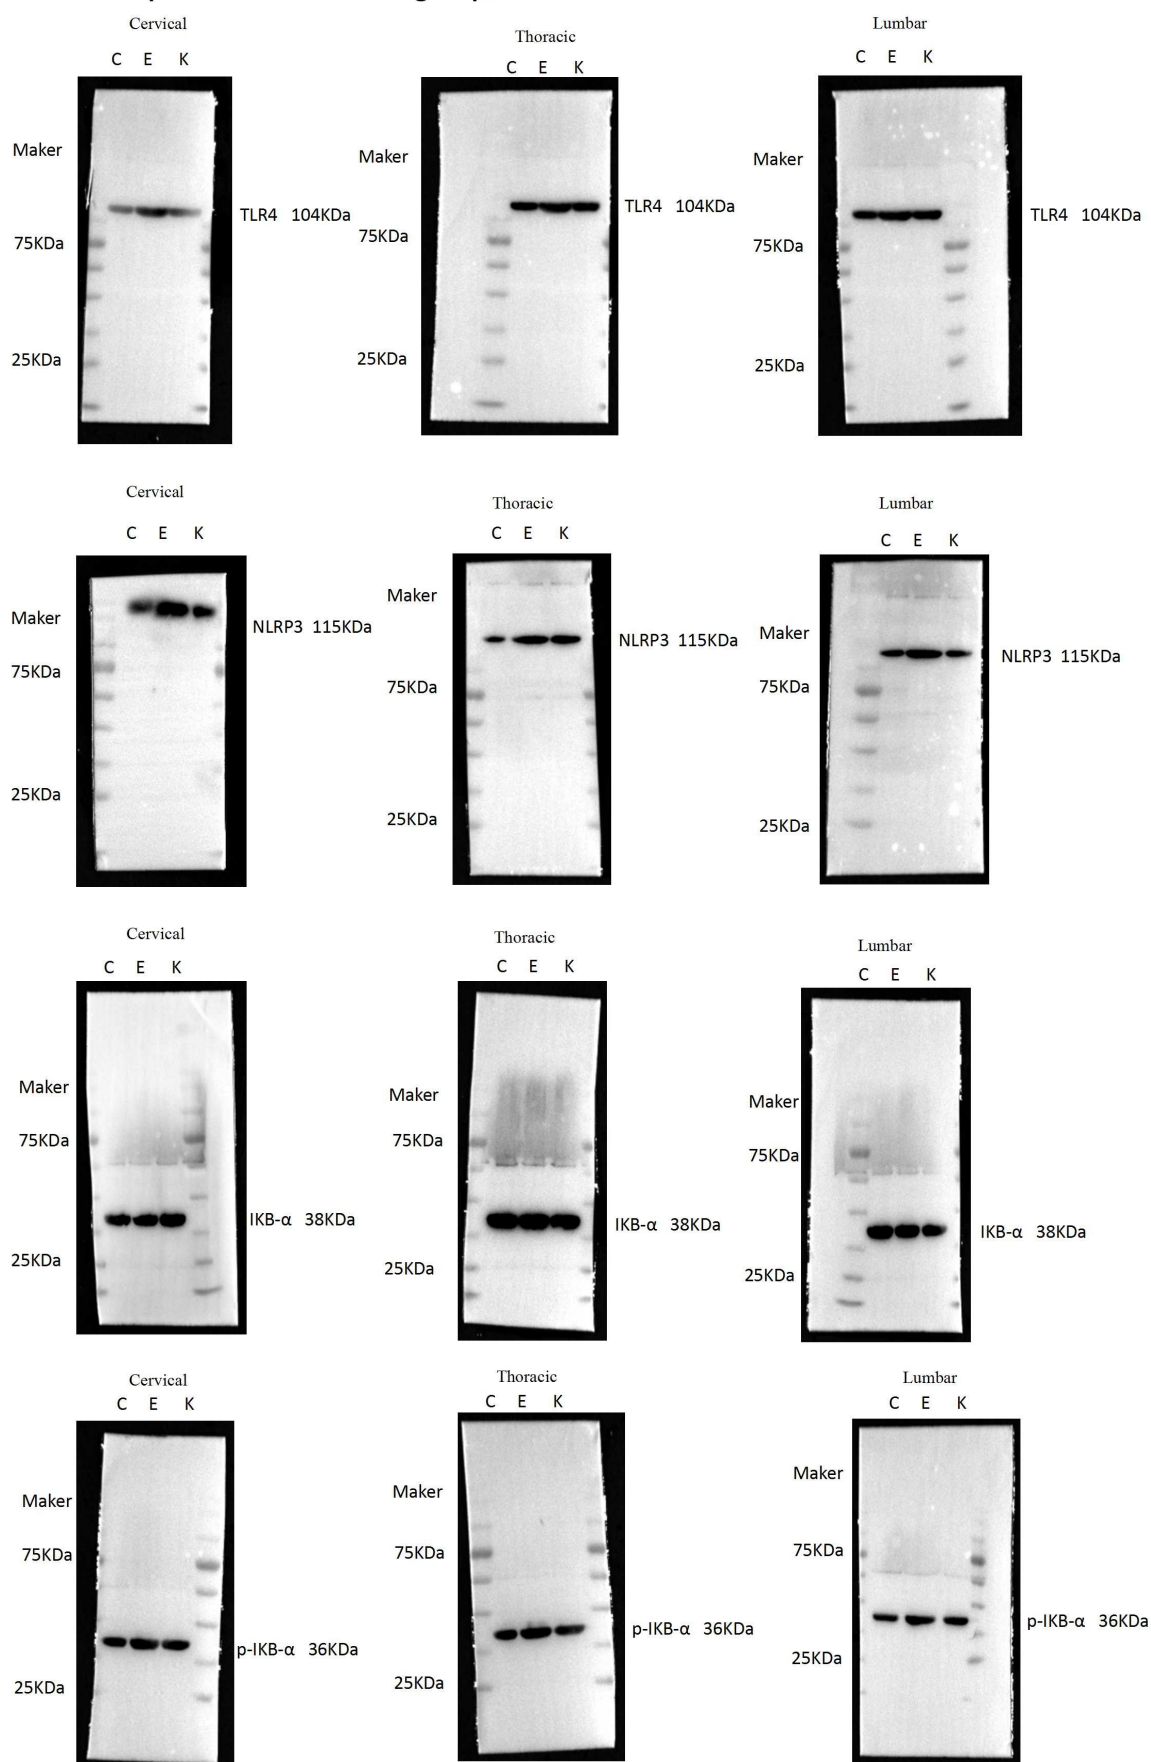

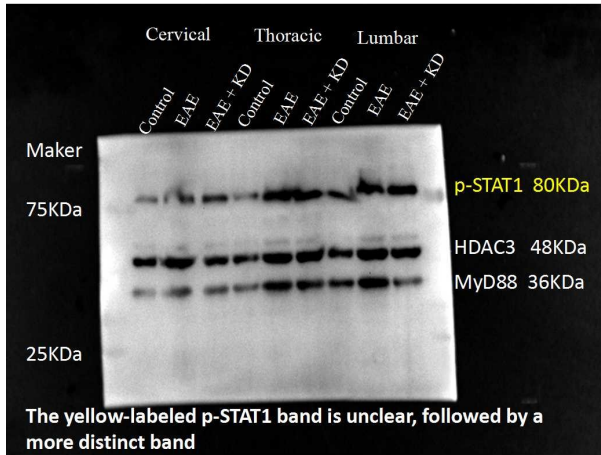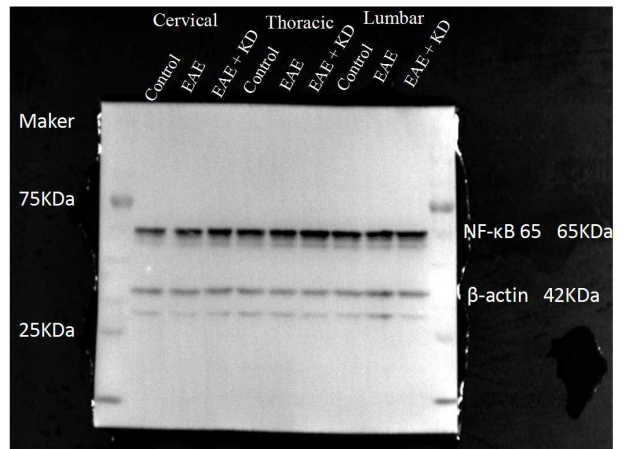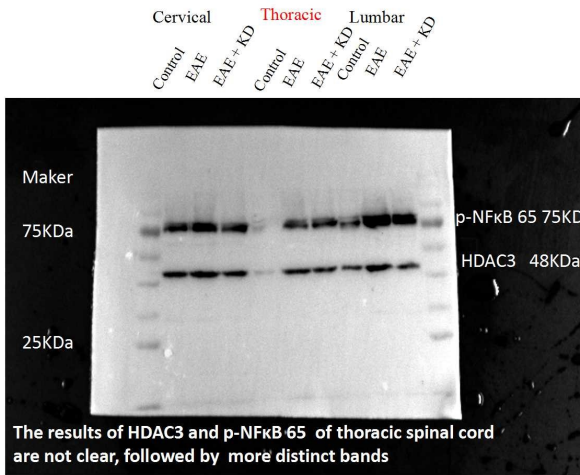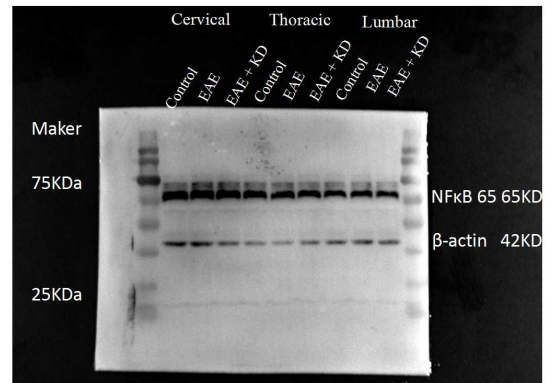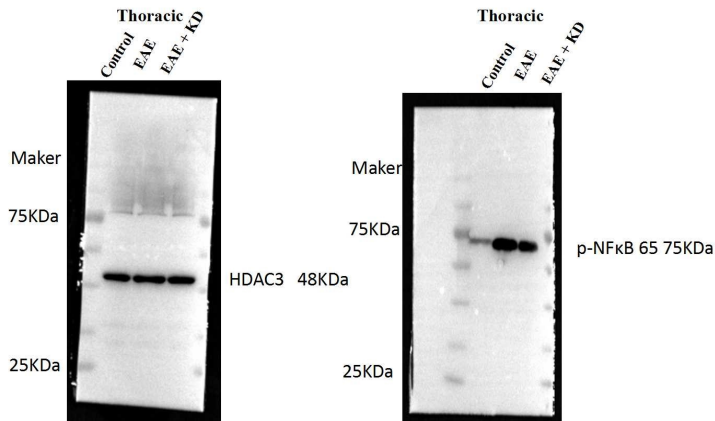

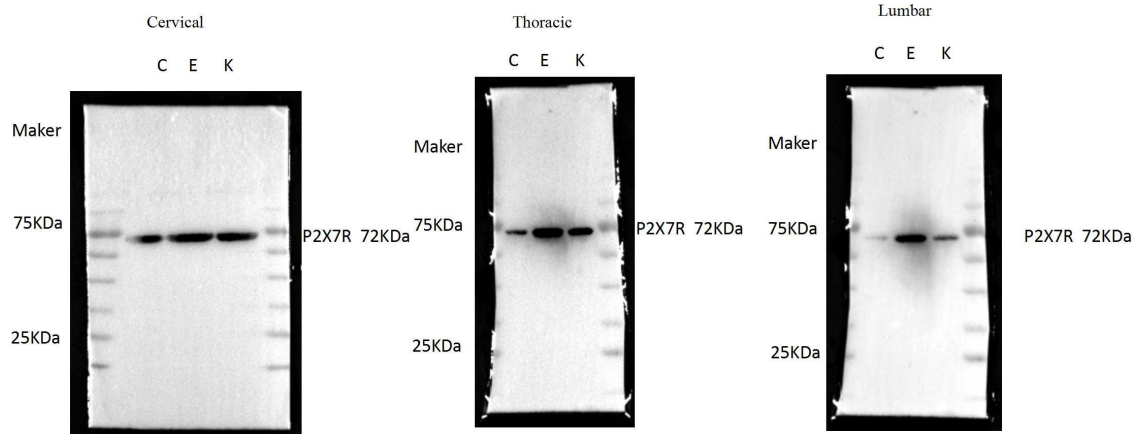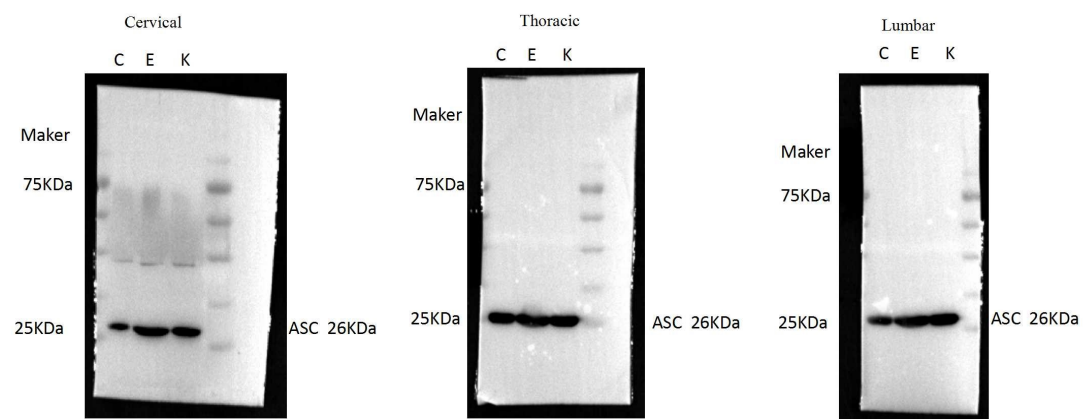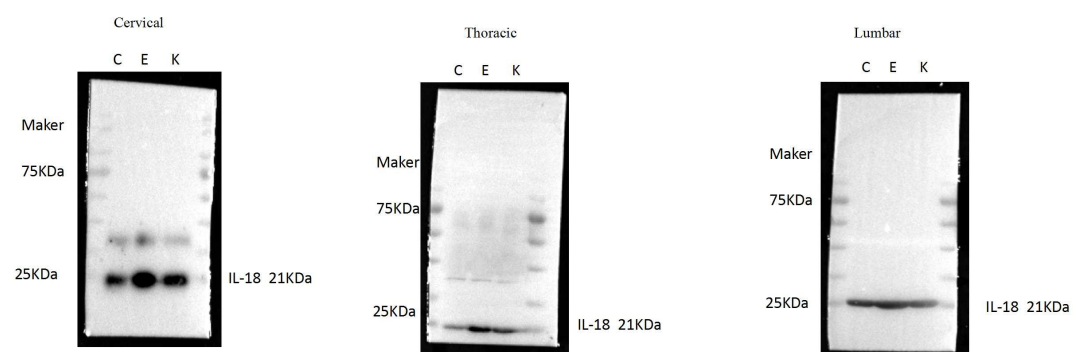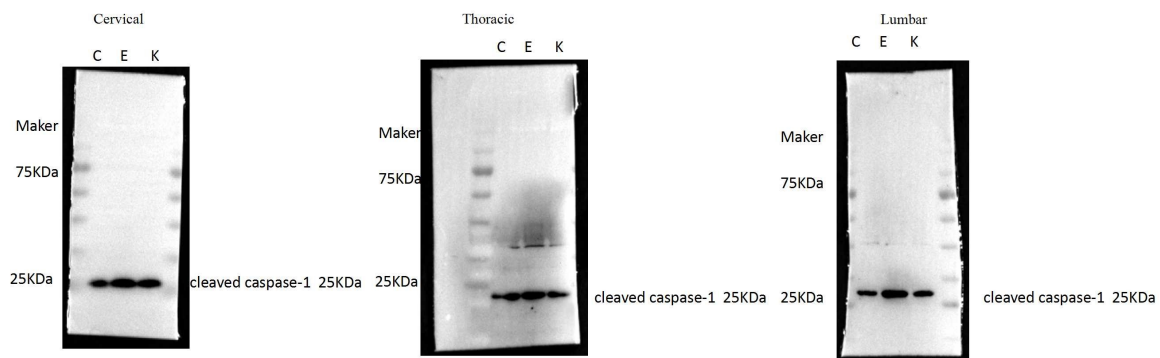

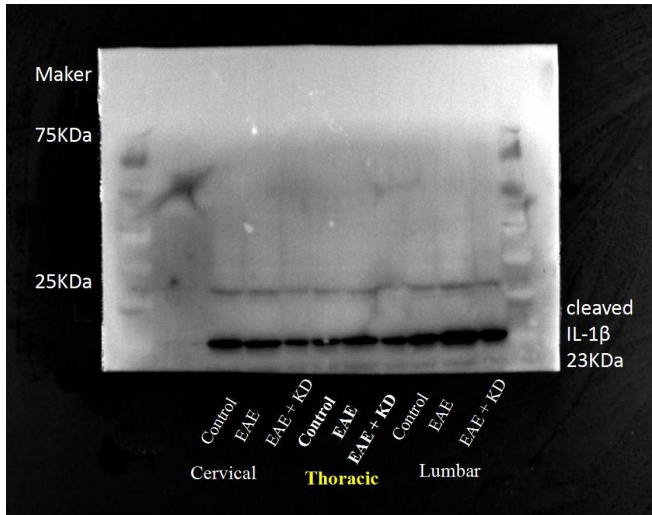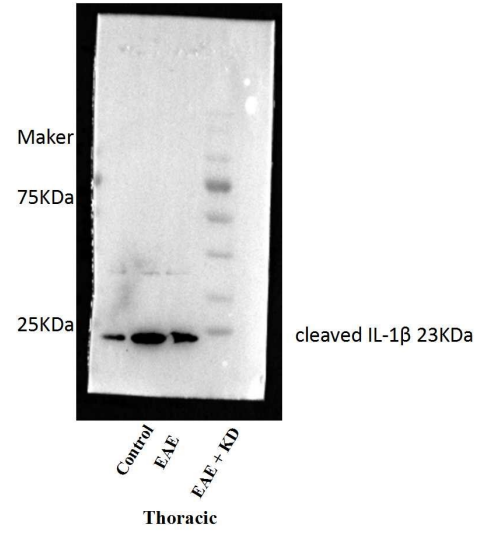

The WB result of the thoracic spinal cord has a air bubble, followed by a more distinct band

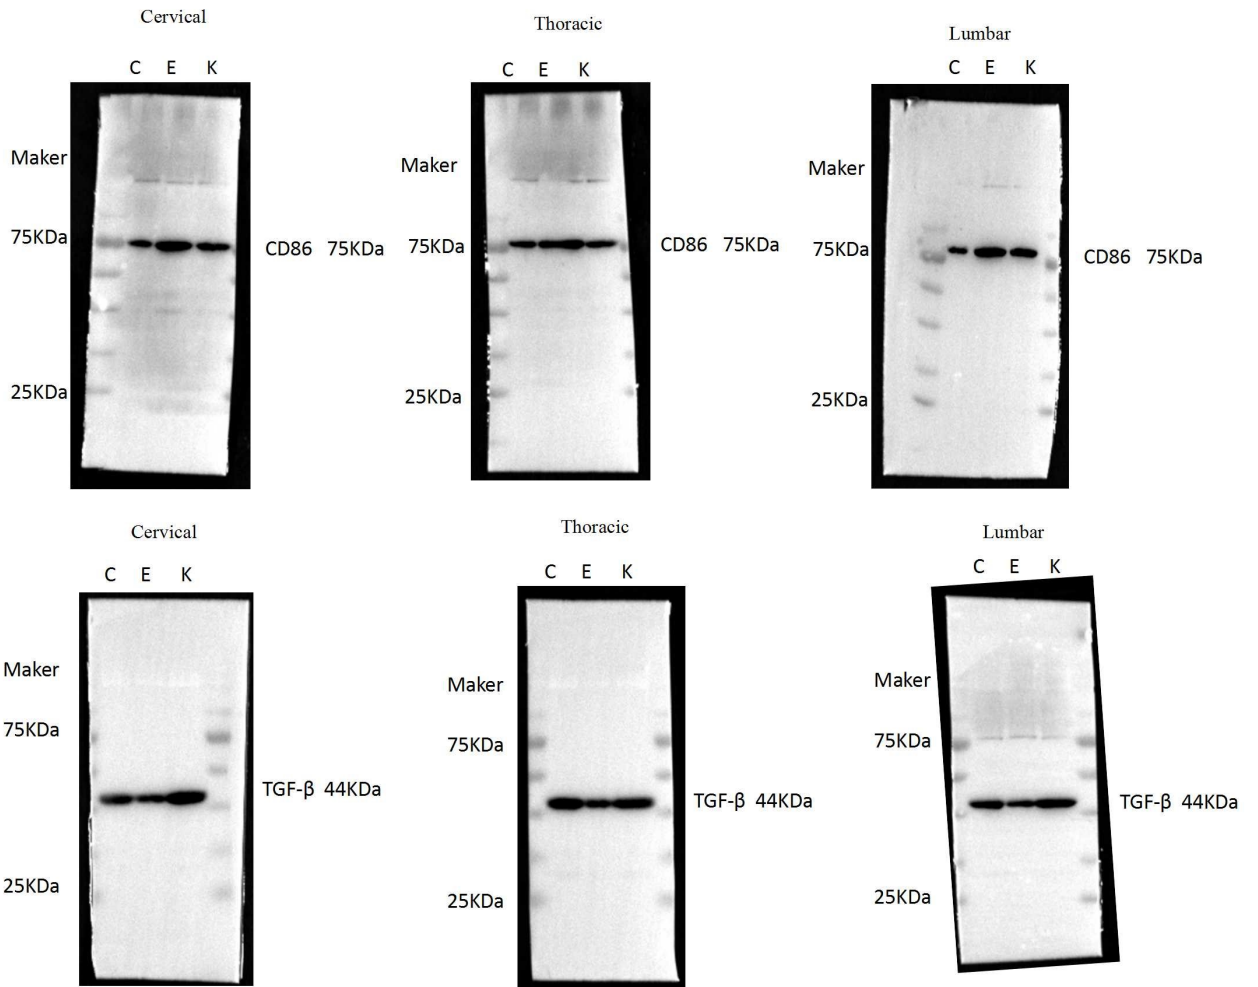

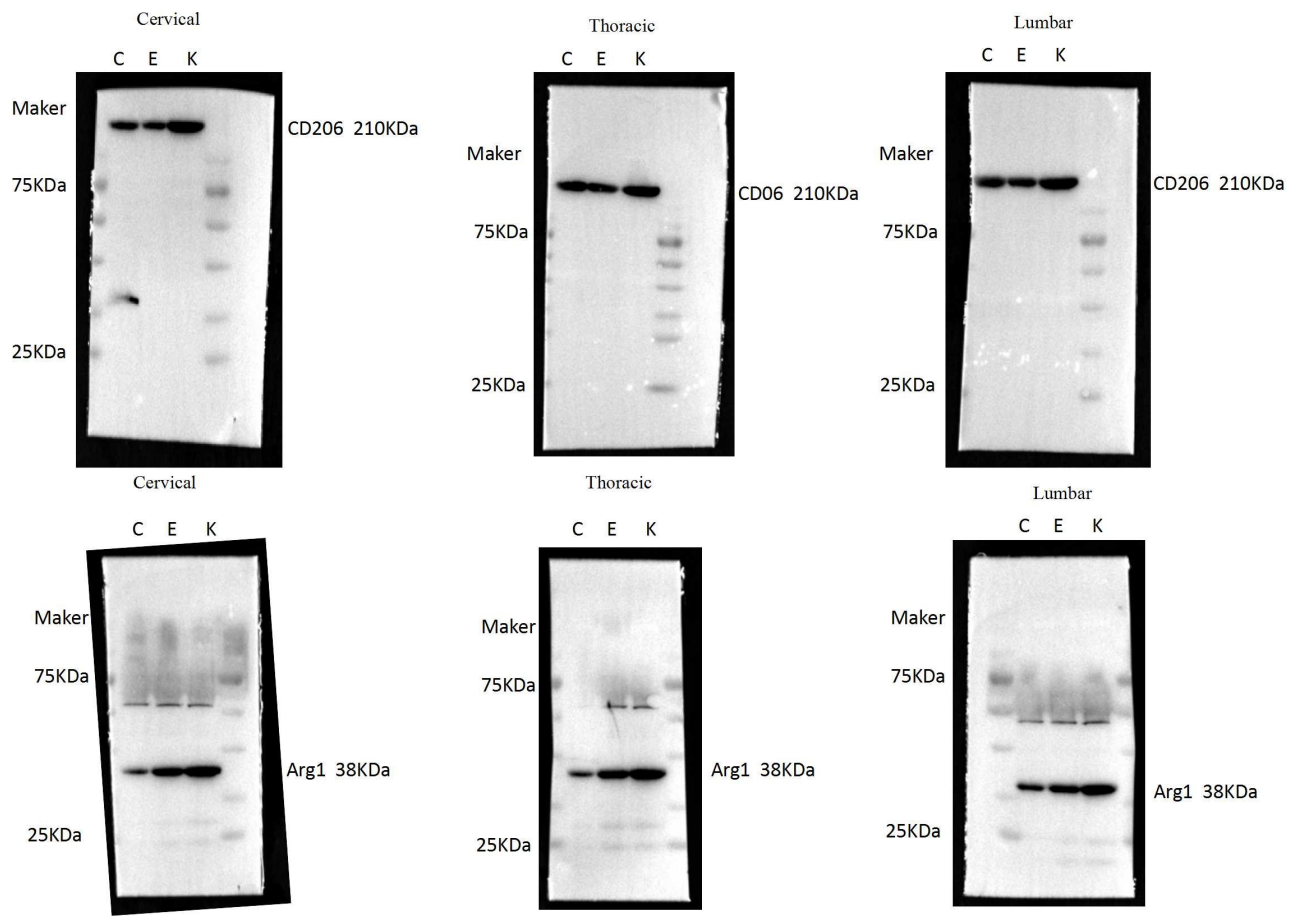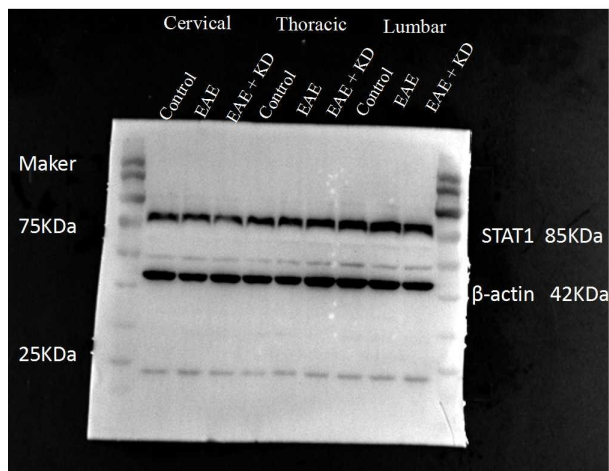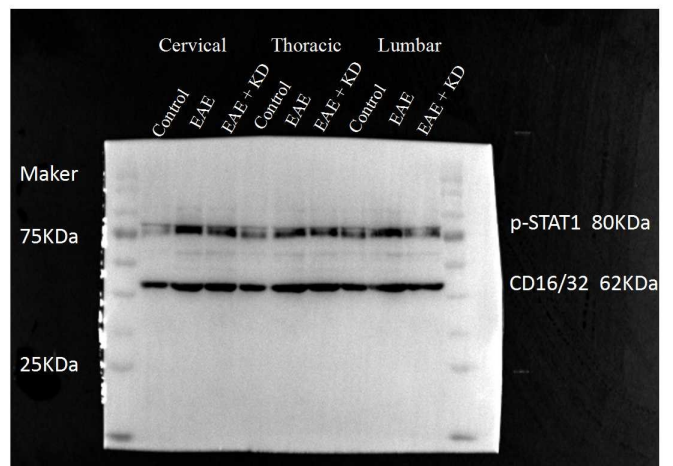

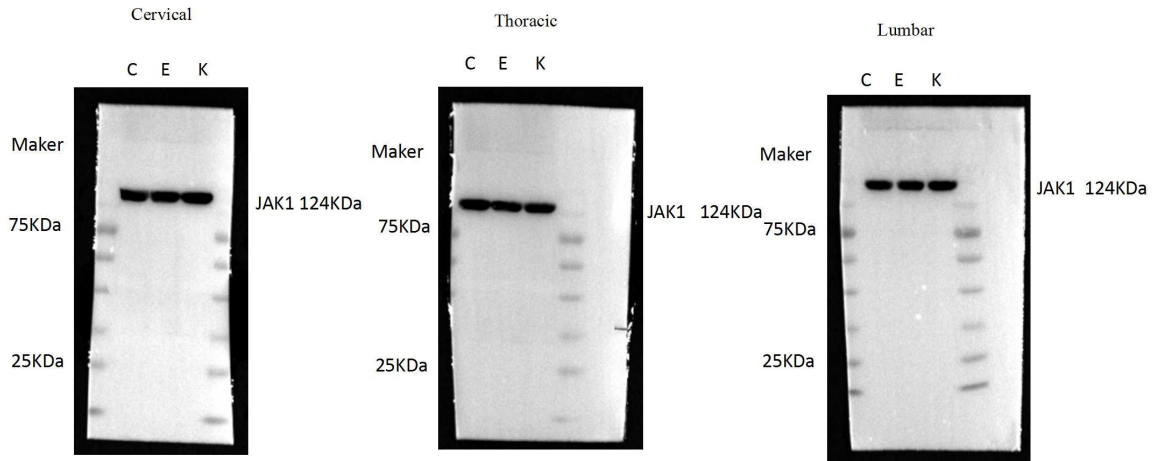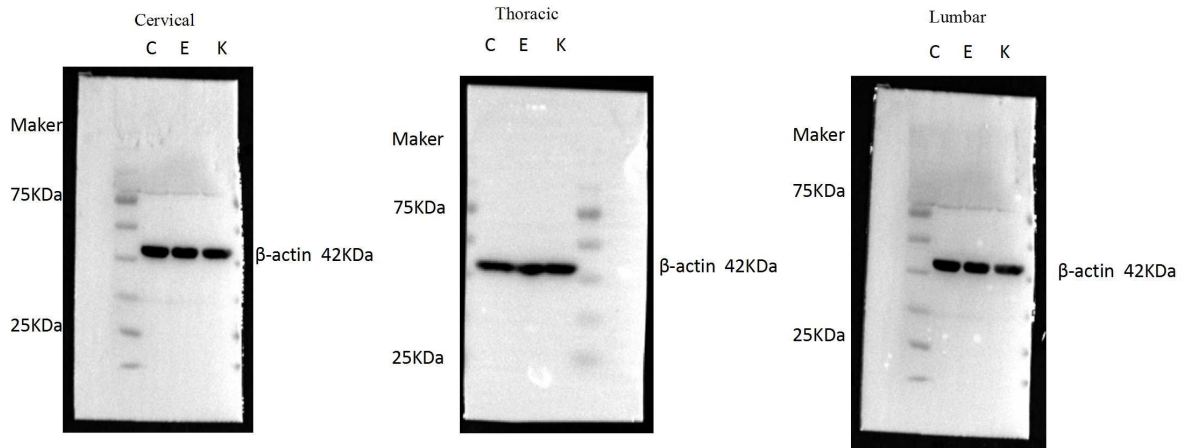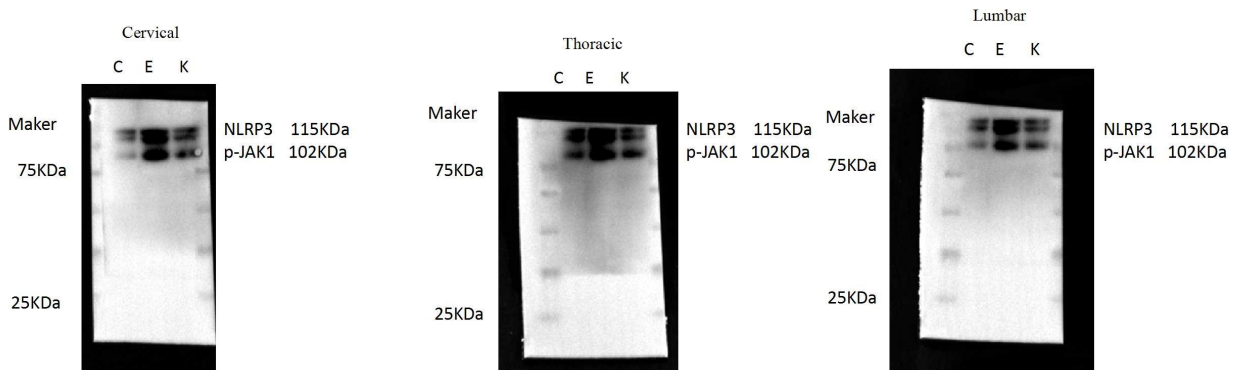

The WB result of p-JAK1 in the cervical spinal cord has an air bubble, followed by a more distinct band

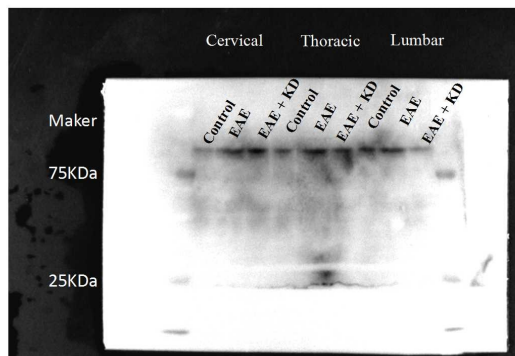

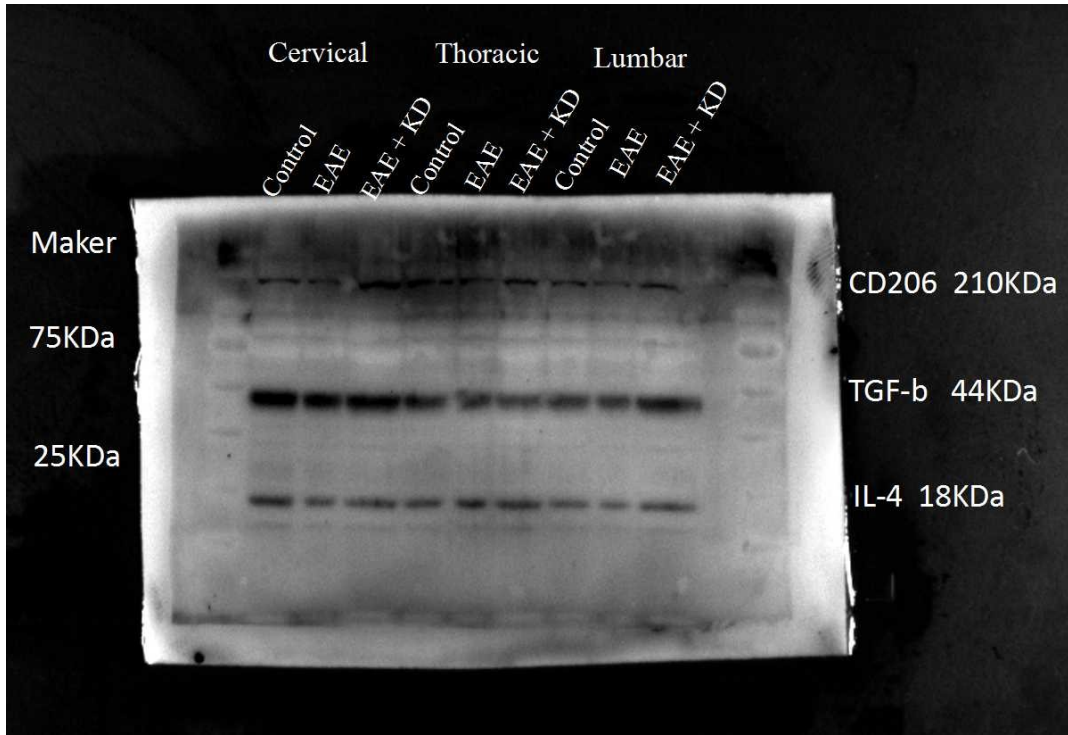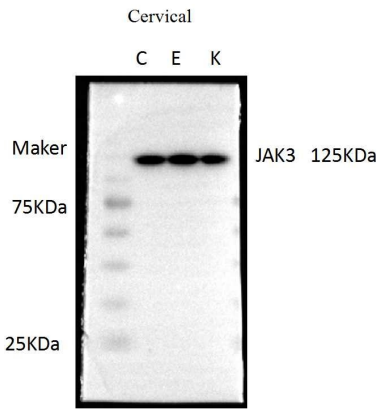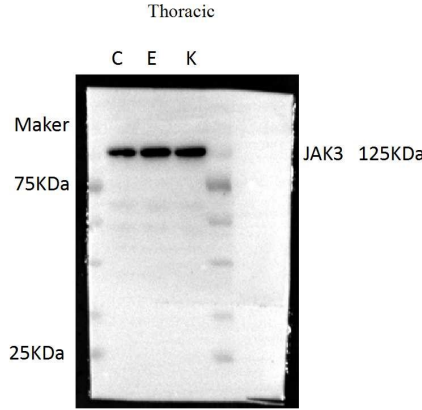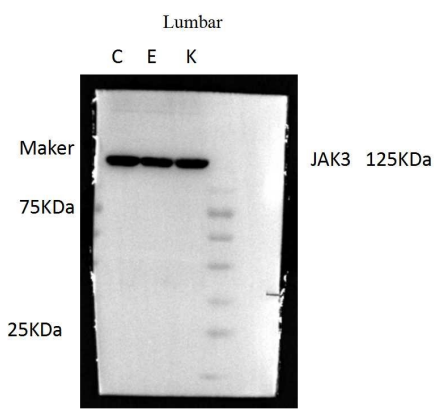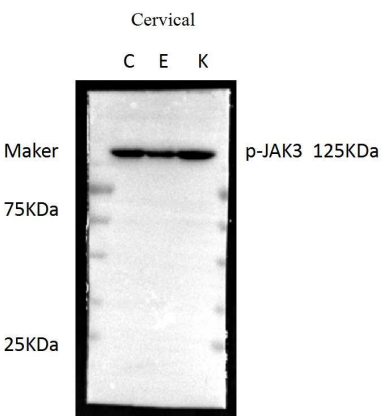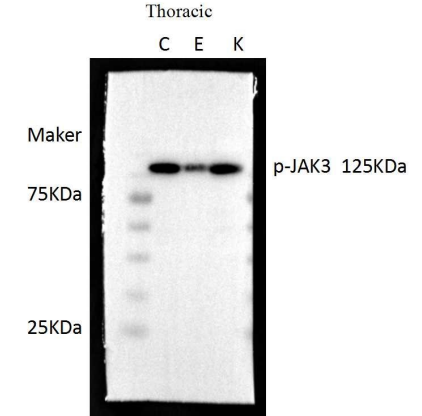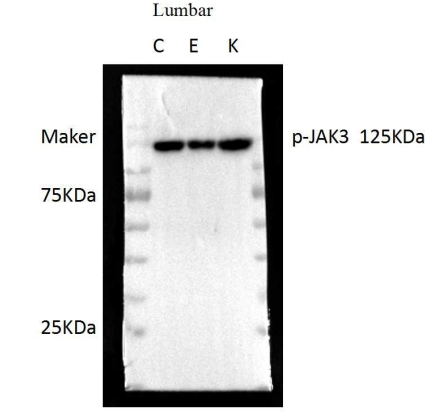

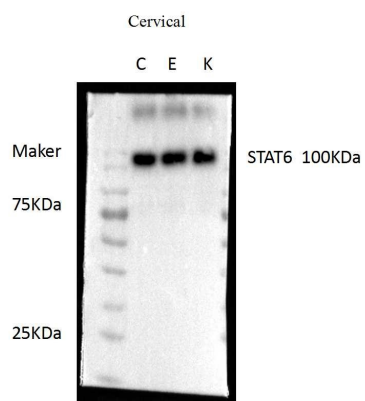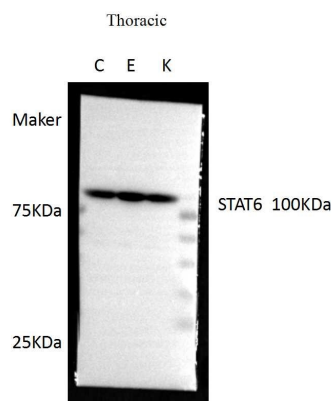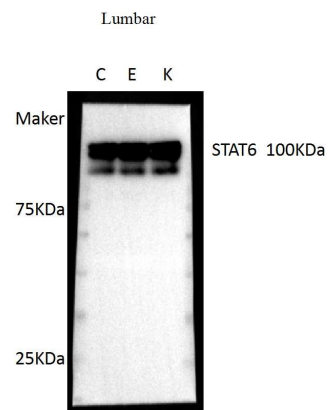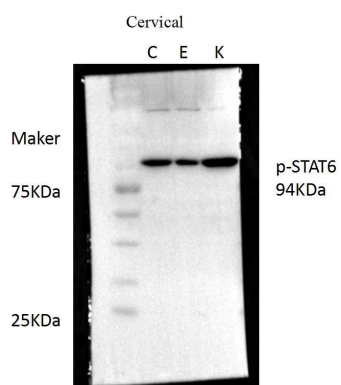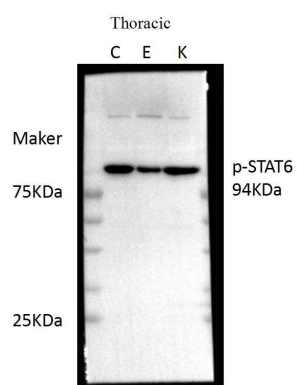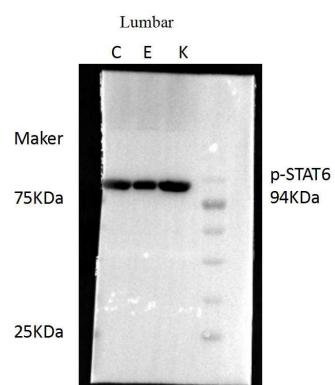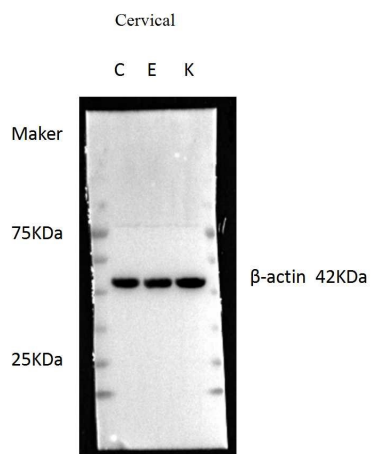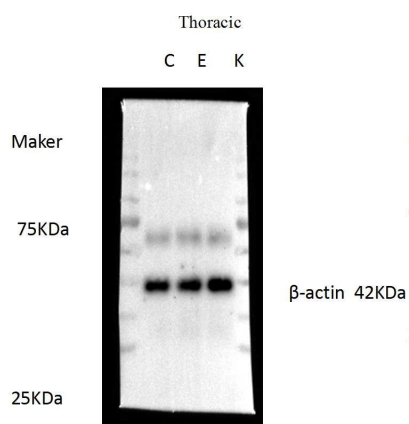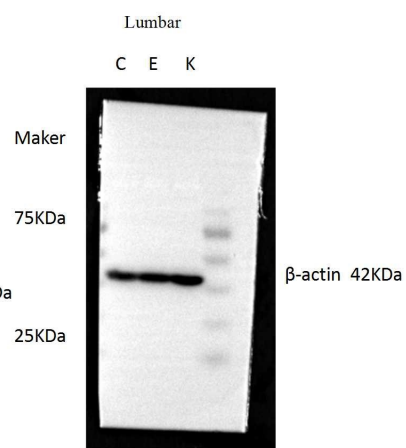

Supplement: d3fo00122a1.pdf [file d3fo00122a1.pdf]
